# Supplementary material for: Green synthesis of luminescent soft materials derived from task-specific ionic liquid for solubilizing lanthanide oxides and organic ligand
Source: Royal Society of Chemistry journal article supplement (doi:10.1039/b902663k), 2009-01-01
Supplement: b902663k.pdf [file b902663k.pdf]

Supplementary information

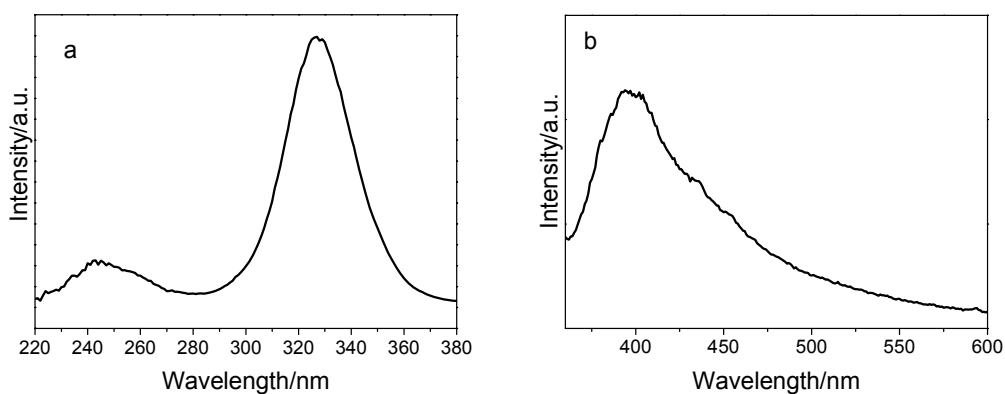

Fig.S1 Excitation (a) and emission (b) spectra of **IL-2**

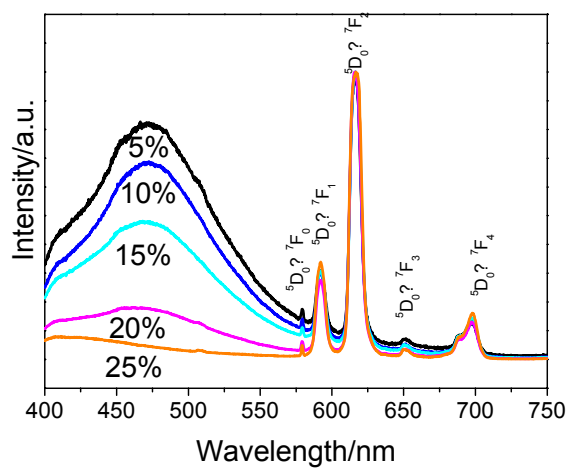

Fig. S2 Emission spectra of Eu/IL-2 , the spectra were recorded at room temperature by excitation at 350nm.

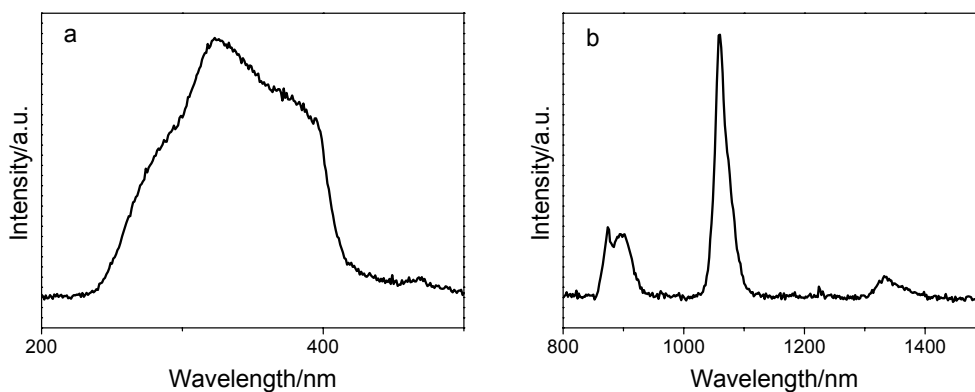

Fig. S3 Excitation (a) and emission spectra (b) of **Nd-TTA/IL-2**. The excitation spectrum was obtained by monitoring at 1064nm and the emission spectrum was obtained by excitation at 324nm.

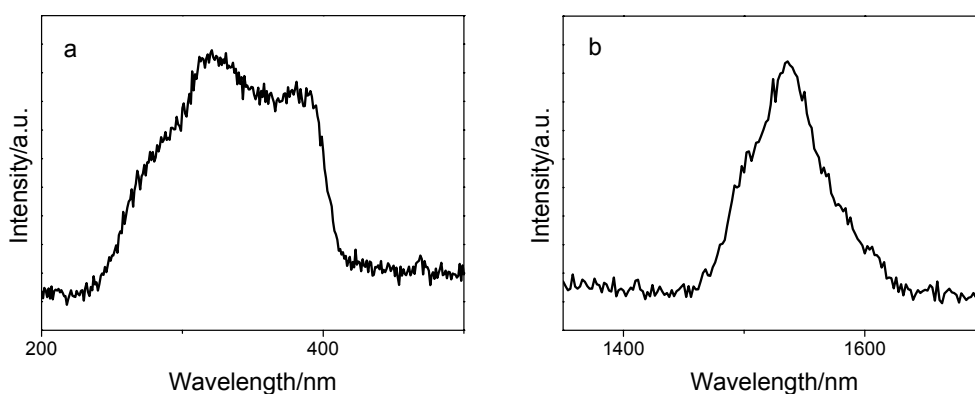

Fig. S4 Excitation (a) and emission spectra (b) of **Er-TTA/IL-2**. The excitation spectrum was obtained by monitoring at 1542nm and the emission spectrum was obtained by excitation at 324nm.
